# Supplementary material
Source: publisher figshare collection journal article supplement (https://springernature.figshare.com/ndownloader/files/12416774)
Supplement: Supplementary file 1 [file 12416774]

# Additional file 1

Table S1: Descriptive statistics of employed variables

| Variable                              | Min     | Median   | Mean     | Max       | Std. Dev. |
|---------------------------------------|---------|----------|----------|-----------|-----------|
| Apprenticeship                        | 2.9000  | 5.9500   | 5.8800   | 8.9000    | 0.9222    |
| Share of Mittelstand firms            | 58.3000 | 83.9000  | 82.7000  | 91.0000   | 5.0180    |
| Unemployment rate                     | 1.9000  | 6.3000   | 6.8200   | 18.3000   | 2.9390    |
| Unemployed potential trainees         | 5.0000  | 10.9000  | 10.8000  | 16.0000   | 1.7720    |
| Medium-skilled potential trainees     | 0.0268  | 0.1080   | 0.1090   | 0.2370    | 0.0327    |
| High-skilled potential trainees       | 0.0000  | 0.0635   | 0.0681   | 0.1750    | 0.0302    |
| Size of universities                  | 0.0000  | 0.0031   | 0.1390   | 2.7700    | 0.3448    |
| Distance to universities              | 0.0000  | 0.0000   | 10.8000  | 58.0000   | 13.4600   |
| Small firms                           | 4.7800  | 8.0000   | 8.0500   | 12.3000   | 1.3630    |
| Large firms                           | 0.8400  | 2.0400   | 2.1100   | 4.0500    | 0.6640    |
| Working-age population                | 60.9000 | 65.3000  | 65.4000  | 72.5000   | 1.7030    |
| Population density                    | 41.0000 | 232.0000 | 569.0000 | 4270.0000 | 694.5000  |
| GDP per capita                        | 13.3000 | 27.3000  | 30.3000  | 85.4000   | 11.3500   |
| CDU/CSU/FDP                           | 30.0000 | 52.0000  | 51.7000  | 71.1000   | 7.9360    |
| Other parties                         | 7.3700  | 14.2200  | 14.6200  | 28.4200   | 2.895     |
| Sectors                               |         |          |          |           |           |
| Agriculture, forestry and fishing     | 0.1370  | 1.9000   | 2.4200   | 10.2000   | 1.9600    |
| Mining and quarrying                  | 0.0000  | 0.0682   | 0.0927   | 0.7520    | 0.0921    |
| Manufacturing                         | 2.8800  | 6.6100   | 6.9000   | 20.9000   | 2.2490    |
| Electricity                           | 0.0380  | 0.4060   | 0.6000   | 6.9200    | 0.6696    |
| Water supply and waste management     | 0.0622  | 0.2870   | 0.2920   | 0.8680    | 0.1069    |
| Construction                          | 5.4400  | 11.5000  | 11.3000  | 17.0000   | 2.5310    |
| Wholesale and retail trade            | 15.0000 | 22.9000  | 22.8000  | 31.0000   | 2.3440    |
| Transportation and storage            | 1.5800  | 3.3800   | 3.6300   | 15.4000   | 1.2090    |
| Accommodation and food service        | 2.7200  | 5.5400   | 5.9000   | 13.0000   | 1.6480    |
| Information and communication         | 0.8310  | 2.2800   | 2.5000   | 9.7800    | 1.1160    |
| Finance and insurance                 | 1.8700  | 3.4400   | 3.4500   | 5.7800    | 0.5859    |
| Real estate activities                | 1.8400  | 3.7600   | 3.9300   | 10.7000   | 1.1970    |
| Professional and technical activities | 6.7600  | 12.3000  | 12.9000  | 23.1000   | 3.0470    |
| Administrative and support service    | 3.0100  | 4.8400   | 5.0400   | 11.8000   | 1.1900    |
| Public administration                 | 0.0561  | 0.3580   | 0.4230   | 1.4300    | 0.2563    |
| Education                             | 0.4600  | 1.0700   | 1.1300   | 2.3900    | 0.3095    |
| Human health and social work          | 1.8800  | 3.8100   | 3.9100   | 7.2500    | 0.9856    |
| Arts, entertainment and recreation    | 0.9080  | 1.7200   | 1.8000   | 3.7200    | 0.4523    |
| Other service activities              | 2.3400  | 4.7300   | 5.1300   | 16.5000   | 1.8920    |
| Households as employers               | 0.0000  | 0.0217   | 0.0297   | 0.1640    | 0.0305    |
| Extraterritorial organisations        | 0.0000  | 0.0000   | 0.0309   | 2.7200    | 0.2018    |
| No sector information                 | 0.0460  | 5.0800   | 5.8000   | 17.3000   | 3.8470    |
| Occupations                           |         |          |          |           |           |
| Farmer, forestry workers and miners   | 0.3000  | 1.3000   | 1.6400   | 11.1000   | 1.0990    |
| Chemical worker                       | 0.1000  | 1.4000   | 1.9100   | 16.5000   | 1.7840    |
| Metal cutters and connectors          | 0.1000  | 1.8000   | 2.2400   | 11.6000   | 1.6450    |
| Smiths, fitters and mechanics         | 2.6000  | 7.2000   | 7.3300   | 20.3000   | 2.0320    |
| Electricians                          | 1.3000  | 2.4000   | 2.5100   | 6.2000    | 0.6587    |
| Assemblers                            | 0.1000  | 1.6000   | 2.1900   | 22.7000   | 2.1560    |
| Food makers                           | 1.0000  | 2.7000   | 2.8900   | 8.7000    | 1.1510    |
| Building construction labourers       | 0.6000  | 2.4000   | 2.5500   | 6.9000    | 1.1950    |
| Wood-product makers                   | 0.2000  | 0.8000   | 0.9050   | 3.5000    | 0.5707    |
| Painters and surface finishers        | 0.3000  | 0.8000   | 0.8820   | 3.3000    | 0.3043    |

Descriptive statistics of employed variables, continued

| Variable                       | Min    | Median  | Mean    | Max     | Std. Dev. |
|--------------------------------|--------|---------|---------|---------|-----------|
| Products testers and packagers | 0.2000 | 1.5000  | 1.5500  | 5.4000  | 0.7334    |
| Labourers no further specified | 0.5000 | 2.0000  | 2.3000  | 18.3000 | 1.5630    |
| Machine operators              | 0.1000 | 0.6000  | 0.7310  | 5.0000  | 0.4734    |
| Engineers and chemists         | 0.5000 | 1.9000  | 2.2700  | 12.1000 | 1.4330    |
| Technicians                    | 1.3000 | 4.0000  | 4.1400  | 14.3000 | 1.3060    |
| Sellers and salespersons       | 4.4000 | 8.1000  | 8.2000  | 15.1000 | 1.4170    |
| Service agents and clerks      | 1.3000 | 3.0000  | 3.4300  | 17.4000 | 1.6400    |
| Surface transport occupations  | 3.7000 | 7.2000  | 7.4900  | 16.5000 | 1.8400    |
| Managers and office clerks     | 9.0000 | 18.2000 | 19.5000 | 38.7000 | 4.0770    |
| Protective services workers    | 0.6000 | 1.2000  | 1.3400  | 5.2000  | 0.5241    |
| Authors and editors            | 0.2000 | 0.5000  | 0.6820  | 11.4000 | 0.7499    |
| Health care occupations        | 3.0000 | 7.6000  | 7.6500  | 15.3000 | 1.9940    |
| Care occupations and teachers  | 2.2000 | 6.0000  | 6.1500  | 11.4000 | 1.4950    |
| Hairdressers and cleaners      | 2.7000 | 5.5500  | 5.8000  | 15.6000 | 1.6260    |
| No occupational information    | 0.3000 | 0.9000  | 1.0100  | 6.3000  | 0.5478    |
| N = 326                        |        |         |         |         |           |

Table S2: Industrial sector classification (NACE Rev. 2, one digit)

| Variable                              | Industrial sector classification | Description                                                                                                                |
|---------------------------------------|----------------------------------|----------------------------------------------------------------------------------------------------------------------------|
| Agriculture, forestry and fishing     | A                                | Agriculture, forestry and fishing                                                                                          |
| Mining and quarrying                  | B                                | Mining and quarrying                                                                                                       |
| Manufacturing                         | C                                | Manufacturing                                                                                                              |
| Electricity                           | D                                | Electricity, gas, steam and air conditioning supply                                                                        |
| Water supply and waste management     | E                                | Water supply; sewerage, waste management and remediation activities                                                        |
| Construction                          | F                                | Construction                                                                                                               |
| Wholesale and retail trade            | G                                | Wholesale and retail trade; repair of motor vehicles and motorcycles                                                       |
| Transportation and storage            | H                                | Transportation and storage                                                                                                 |
| Accommodation and food service        | I                                | Accommodation and food service activities                                                                                  |
| Information and communication         | J                                | Information and communication                                                                                              |
| Finance and insurance                 | K                                | Financial and insurance activities                                                                                         |
| Real estate activities                | L                                | Real estate activities                                                                                                     |
| Professional and technical activities | M                                | Professional, scientific and technical activities                                                                          |
| Administrative and support service    | N                                | Administrative and support service activities                                                                              |
| Public administration                 | O                                | Public administration and defence; compulsory social security                                                              |
| Education                             | P                                | Education                                                                                                                  |
| Human health and social work          | Q                                | Human health and social work activities                                                                                    |
| Arts, entertainment and recreation    | R                                | Arts, entertainment and recreation                                                                                         |
| Other service activities              | S                                | Other service activities                                                                                                   |
| Households as employers               | T                                | Activities of households as employers; undifferentiated goods- and services-producing activities of households for own use |
| Extraterritorial organisations        | U                                | Activities of extraterritorial organisations and bodies                                                                    |

Source: Federal Statistical Office (2008).

Table S3: Relevant section of the German occupational classification from 1988

| Variable                            | Occupational classification | Description                                                                                                                                                                                                                                                                                                                                   |
|-------------------------------------|-----------------------------|-----------------------------------------------------------------------------------------------------------------------------------------------------------------------------------------------------------------------------------------------------------------------------------------------------------------------------------------------|
| Farmer, forestry workers and miners | I.II.01.09                  | Mixed crop and animal producers; livestock and fish farmer; agricultural production manager and advisors; farm hands, mixed crop and livestock farm labourers; gardeners, horticultural and nursery growers; forestry workers and huntspersons; miners; mineral exploitation and quarry workers; mineral and stone processing plant operators |
| Chemical worker                     | III.14.15                   | Chemical worker; plastic products machine operators                                                                                                                                                                                                                                                                                           |
| Metal cutters and connectors        | III.19.24                   | Metal furnace and rolling-mill operators; moulders, casters; metal moulders non cutting deformation; metal-cutters; metal surface processors and finishers; metal connectors                                                                                                                                                                  |
| Smiths, fitters and mechanics       | III.25.30                   | Smiths; thinsmiths, plumbers and pipe fitters; locksmiths and fitters; mechanics; toolmakers, instrument mechanics; precious fitters and related occupations                                                                                                                                                                                  |
| Electricians                        | III.31                      | Electricians                                                                                                                                                                                                                                                                                                                                  |
| Assemblers                          | III.32                      | Assemblers and metal plant operators otherwise undisclosed                                                                                                                                                                                                                                                                                    |
| Food makers                         | III.39.43                   | Bakers, pastry-cooks and confectionery makers; butchers, fish-processing-machine operators and related food preparers; cooks and other food makers; beverage and semiluxury food makers; other food makers                                                                                                                                    |
| Building construction labourers     | III.44.47                   | Bricklayers and concreters; carpenters, roofers, scaffolders; road, maintenance and civil engineering building experts; building construction labourers                                                                                                                                                                                       |
| Wood-product makers                 | III.50                      | Cabinetmakers, carpenters, joiners and other wood-product makers                                                                                                                                                                                                                                                                              |
| Painters and surface finishers      | III.51                      | Painters, wallpaperers, varnishers and surface finishers                                                                                                                                                                                                                                                                                      |
| Products testers and packagers      | III.52                      | Products testers, packagers and loading agents                                                                                                                                                                                                                                                                                                |
| Labourers no further specified      | III.53                      | Labourers no further specified                                                                                                                                                                                                                                                                                                                |
| Machine operators                   | III.54                      | Machine operators and related occupations                                                                                                                                                                                                                                                                                                     |
| Engineers and chemists              | IV.60.61                    | Engineers; chemists, physicists, mathematicians                                                                                                                                                                                                                                                                                               |
| Technicians                         | IV.62.63                    | Technicians; science technicians                                                                                                                                                                                                                                                                                                              |
| Sellers and salespersons            | V.68                        | Sellers and salespersons                                                                                                                                                                                                                                                                                                                      |
| Service agents and clerks           | V.69.70                     | Banking, building society and insurance experts; other service agents, clerks and related occupations                                                                                                                                                                                                                                         |
| Surface transport occupations       | V.71.74                     | Surface transport occupations; water- and air traffic occupations; communication traffic occupations; stock, loading and transport occupations                                                                                                                                                                                                |
| Managers and office clerks          | V.75.78                     | Entrepreneurs, managers, consultants, accountants and related clerks; legislators, senior and administrative officials; calculators, bookkeepers, computing and data processing professionals; office clerks and hands                                                                                                                        |
| Protective services workers         | V.79.81                     | Attendance and protective services workers; soldiers, police officers, firefighters, safety and health inspectors; judges, lawyers, legal professionals and executory officers                                                                                                                                                                |
| Authors and editors                 | V.82.83                     | Authors, editors, interpreters, librarians and related clerks; artists and related occupations                                                                                                                                                                                                                                                |
| Health care occupations             | V.84.85                     | Medical doctors, pharmacists; remaining health care occupations                                                                                                                                                                                                                                                                               |
| Care occupations and teachers       | V.86.89                     | Social welfare, care occupations; teachers and teaching professionals; humanities and natural scientists, otherwise undisclosed; religious professionals, associated professionals and assistants                                                                                                                                             |
| Hairdressers and cleaners           | V.90.93                     | Hairdressers, barbers, beauticians and related workers; hotel and restaurant occupations; housekeeping occupations; launderers and cleaners                                                                                                                                                                                                   |

Source: Federal Employment Agency (1988) and Research Data Centre of the German Federal Employment Agency at the Institute for Employment Research (2010).

| Table S4: OLS with all German counties |           |            |
|----------------------------------------|-----------|------------|
| Dependent variable: Apprenticeship     |           |            |
|                                        | (1)       | (2)        |
| Share of Mittelstand firms             | 0.0370*** | 0.0304**   |
| Unemployment rate                      |           | -0.0448**  |
| Unemployed potential trainees          |           | 0.1010***  |
| Medium-skilled potential trainees      |           | -0.5221    |
| High-skilled potential trainees        |           | 3.0898     |
| Size of universities                   |           | -0.5124*** |
| Distance to universities               |           | 0.0026     |
| Small firms                            |           | 0.2203***  |
| Large firms                            |           | 0.0029     |
| Working-age population                 |           | 0.0415     |
| Population density                     |           | -0.0000    |
| GDP per capita                         |           | -0.0145**  |
| CDU/CSU/FDP                            |           | 0.0262***  |
| Other parties                          |           | 0.0277**   |
| Sectors                                |           | X          |
| Occupations                            |           | X          |
| N                                      | 413       | 413        |
| adj R <sup>2</sup>                     | 0.027     | 0.568      |
| F-value                                | 12.4***   | 10.2***    |

\*\*\* p<0.01, \*\* p<0.05, \* p<0.1.

Figure S1: Moran scatterplot of OLS residuals

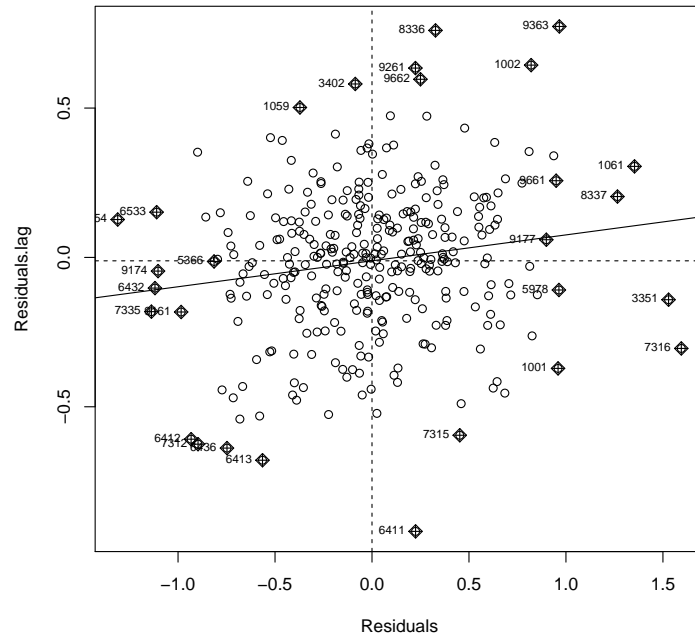

Table S5: Lagrange-Multiplier-tests

|        | Lagrange Multiplier | p-value |
|--------|---------------------|---------|
| LMerr  | 5.3                 | 0.02    |
| LMlag  | 29.4                | 0.00    |
| RLMerr | 5.3                 | 0.02    |
| RLMlag | 29.4                | 0.00    |

Table S6: Manski model including sectors and occupations

|                                       | Direct effects | p-values | Indirect effects | p-values | Total effects | p-values |
|---------------------------------------|----------------|----------|------------------|----------|---------------|----------|
| Share of Mittelstand firms            | 0.0218         | 0.0969   | -0.0849          | 0.0616   | -0.0631       | 0.1398   |
| Unemployment rate                     | 0.0273         | 0.2488   | 0.0280           | 0.6783   | 0.0553        | 0.4558   |
| Unemployed potential trainees         | 0.0580         | 0.0081   | 0.2556           | 0.0042   | 0.3136        | 0.0007   |
| Medium-skilled potential trainees     | 0.6358         | 0.6494   | -8.1262          | 0.1762   | -7.4904       | 0.2559   |
| High-skilled potential trainees       | -0.6437        | 0.7007   | 1.0097           | 0.8602   | 0.3660        | 0.9362   |
| Size of universities                  | -0.0666        | 0.7249   | -0.5825          | 0.5329   | -0.6491       | 0.5259   |
| Distance to universities              | 0.0066         | 0.0067   | 0.0028           | 0.7550   | 0.0094        | 0.3804   |
| Sectors                               |                |          |                  |          |               |          |
| Agriculture, forestry and fishing     | -0.0597        | 0.0309   | 0.0694           | 0.4664   | 0.0097        | 0.9218   |
| Mining and quarrying                  | 0.2063         | 0.5795   | 0.9020           | 0.4876   | 1.1084        | 0.4134   |
| Manufacturing                         | 0.0080         | 0.7702   | 0.2968           | 0.0089   | 0.3048        | 0.0092   |
| Electricity                           | -0.0469        | 0.4297   | 0.1346           | 0.3818   | 0.0877        | 0.5478   |
| Water supply and waste management     | -0.1368        | 0.6880   | -0.3747          | 0.7329   | -0.5115       | 0.6750   |
| Construction                          | 0.0086         | 0.7368   | 0.0196           | 0.8694   | 0.0282        | 0.7937   |
| Wholesale and retail trade            | -0.0814        | 0.0001   | 0.0759           | 0.3025   | -0.0054       | 0.9623   |
| Transportation and storage            | 0.0028         | 0.9117   | 0.1808           | 0.1362   | 0.1836        | 0.1563   |
| Accommodation and food service        | 0.0285         | 0.3017   | 0.1060           | 0.3811   | 0.1345        | 0.2671   |
| Information and communication         | -0.1111        | 0.0570   | 0.2078           | 0.2987   | 0.0966        | 0.5812   |
| Finance and insurance                 | 0.0267         | 0.6816   | 0.3584           | 0.1785   | 0.3852        | 0.1748   |
| Real estate activities                | 0.0130         | 0.7223   | 0.2093           | 0.2138   | 0.2223        | 0.1971   |
| Professional and technical activities | -0.0450        | 0.0515   | -0.0395          | 0.5725   | -0.0844       | 0.2793   |
| Administrative and support service    | -0.0040        | 0.9240   | 0.0149           | 0.8490   | 0.0108        | 0.8698   |
| Public administration                 | -0.2864        | 0.0717   | -0.1080          | 0.8497   | -0.3944       | 0.5041   |
| Education                             | 0.3541         | 0.0099   | 0.7498           | 0.1872   | 1.1039        | 0.0625   |
| Human health and social work          | 0.0971         | 0.1556   | -0.6069          | 0.0429   | -0.5098       | 0.1026   |
| Arts, entertainment and recreation    | -0.0288        | 0.8010   | 0.3660           | 0.2551   | 0.3371        | 0.2979   |
| Other service activities              | 0.0114         | 0.5453   | 0.1410           | 0.1002   | 0.1525        | 0.0723   |
| Households as employers               | 0.0155         | 0.9911   | -0.5546          | 0.8459   | -0.5391       | 0.8489   |
| Extraterritorial organisations        | -0.1006        | 0.4397   | -0.4614          | 0.4617   | -0.5620       | 0.3611   |
| Occupations                           |                |          |                  |          |               |          |
| Farmer, forestry workers and miners   | 0.0203         | 0.5796   | 0.3226           | 0.0537   | 0.3428        | 0.0593   |
| Chemical worker                       | -0.0433        | 0.0337   | 0.0449           | 0.6021   | 0.0016        | 0.9503   |
| Metal cutters and connectors          | -0.0359        | 0.1519   | 0.1007           | 0.3319   | 0.0647        | 0.5272   |
| Smiths, fitters and mechanics         | 0.0376         | 0.0820   | 0.0365           | 0.6832   | 0.0741        | 0.4246   |
| Electricians                          | 0.0765         | 0.1127   | 0.1332           | 0.5242   | 0.2097        | 0.3382   |
| Assemblers                            | -0.0478        | 0.0296   | 0.1431           | 0.1160   | 0.0953        | 0.3259   |
| Food makers                           | -0.0009        | 0.9686   | 0.2873           | 0.0593   | 0.2864        | 0.0730   |
| Building construction labourers       | 0.1486         | 0.0009   | 0.3567           | 0.1033   | 0.5053        | 0.0283   |
| Wood-product makers                   | 0.1743         | 0.0139   | 0.1359           | 0.6144   | 0.3103        | 0.3272   |
| Painters and surface finishers        | -0.1488        | 0.1835   | 0.4874           | 0.3420   | 0.3386        | 0.5322   |
| Products testers and packagers        | 0.0227         | 0.6477   | 0.1471           | 0.4737   | 0.1698        | 0.4530   |
| Labourers no further specified        | -0.0558        | 0.0240   | 0.0054           | 0.9658   | -0.0504       | 0.6709   |
| Machine operators                     | 0.1586         | 0.0331   | 0.2147           | 0.3858   | 0.3733        | 0.1772   |

Manski model including sectors and occupations, continued

|                               | Direct<br>effects | p-values | Indirect<br>effects | p-values | Total<br>effects | p-values |
|-------------------------------|-------------------|----------|---------------------|----------|------------------|----------|
| Engineers and chemists        | -0.0280           | 0.3880   | 0.2715              | 0.0748   | 0.2434           | 0.1344   |
| Technicians                   | 0.0837            | 0.0118   | 0.0685              | 0.6073   | 0.1522           | 0.2911   |
| Sellers and salespersons      | 0.1286            | 0.0000   | 0.5976              | 0.0003   | 0.7262           | 0.0000   |
| Service agents and clerks     | 0.0884            | 0.0042   | 0.0055              | 0.9572   | 0.0940           | 0.5993   |
| Surface transport occupations | -0.0440           | 0.0484   | -0.0571             | 0.5049   | -0.1011          | 0.2859   |
| Protective services workers   | 0.0110            | 0.8352   | -0.6393             | 0.0630   | -0.6282          | 0.0885   |
| Authors and editors           | 0.0436            | 0.4045   | -0.5072             | 0.1827   | -0.4636          | 0.2317   |
| Health care occupations       | 0.0737            | 0.0027   | 0.3876              | 0.0039   | 0.4613           | 0.0014   |
| Care occupations and teachers | -0.0005           | 0.9995   | -0.0790             | 0.5718   | -0.0795          | 0.5950   |
| Hairdressers and cleaners     | -0.0393           | 0.1548   | 0.0100              | 0.9315   | -0.0293          | 0.8317   |
| No occupational information   | -0.0810           | 0.1883   | 0.2695              | 0.3475   | 0.1885           | 0.5338   |
| Small firms                   | 0.0916            | 0.0505   | -0.0758             | 0.6159   | 0.0158           | 0.9815   |
| Large firms                   | 0.0040            | 0.9257   | 0.7407              | 0.1420   | 0.7447           | 0.1498   |
| Working-age population        | 0.0103            | 0.7459   | 0.1370              | 0.2155   | 0.1474           | 0.1989   |
| Population density            | 0.0000            | 0.8300   | 0.0002              | 0.6656   | 0.0002           | 0.6266   |
| GDP per capita                | -0.0162           | 0.0167   | 0.0132              | 0.6814   | -0.0030          | 0.8974   |
| CDU/CSU/FDP                   | 0.0306            | 0.0008   | -0.0389             | 0.1526   | -0.0083          | 0.7406   |
| Other parties                 | 0.0309            | 0.3036   | -0.0799             | 0.1642   | -0.0489          | 0.3076   |
| N                             | 326               |          |                     |          |                  |          |
| Nagelkerke                    | 0.8386            |          |                     |          |                  |          |
| $\rho$                        | 0.5222 (0.0000)   |          |                     |          |                  |          |
| $\lambda$                     | - 0.7407 (0.0000) |          |                     |          |                  |          |
